# Supplementary material for: Crop Rotation with Marigold Promotes Soil Bacterial Structure to Assist in Mitigating Clubroot Incidence in Chinese Cabbage
Source: MDPI journal article supplement (doi:10.3390/plants11172295), 2022-09-02
Supplement: s1 [file s1]

**Crop rotation with marigold promotes soil bacterial structure to assist in mitigating clubroot incidence in Chinese cabbage**

Jinhao Zhang<sup>1,2,†</sup>, Waqar Ahmed<sup>1,2,†</sup>, Xinghai Zhou<sup>1,2,†</sup>, Bo Yao<sup>1,2</sup>, Zulei He<sup>1,2</sup>, Yue Qiu<sup>1,2</sup>, Fangjun Wei<sup>1,2</sup>, Yilu He<sup>1,2</sup>, Lanfang Wei<sup>1,3\*</sup> and Guanghai Ji<sup>1,2\*</sup>

<sup>1</sup>State Key Laboratory for Conservation and Utilization of Bio-Resources in Yunnan, Yunnan Agricultural University, Kunming 650201, Yunnan, China

<sup>2</sup>Key Laboratory of Agro-Biodiversity and Pest Management of Ministry of Education, Yunnan Agricultural University, Kunming 650201, Yunnan, China

<sup>3</sup>Agricultural Foundation Experiment Teaching Center, Yunnan Agricultural University, Kunming 650201, Yunnan, China

†These authors contributed equally to this work.

**\*Correspondence:**

Guanghai Ji

jghai001@163.com

Lanfang Wei

wlfang2000@aliyun.com

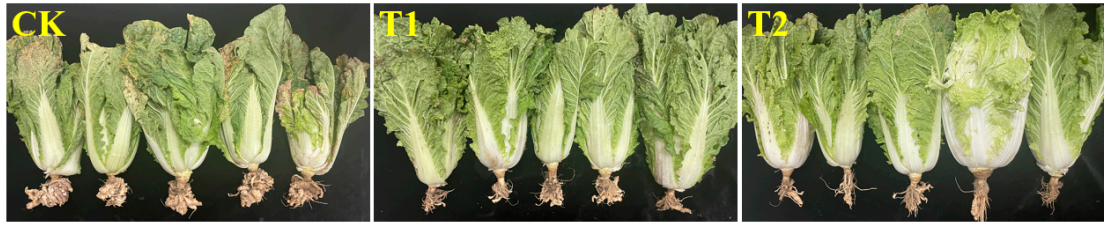

**Figure S1;** Effect of marigold crop rotation on the incidence of clubroot in Chinese cabbage under field conditions. **Here;** Monocropping of Chinese cabbage (**CK**), Chinese cabbage seedlings were transplanted immediately after harvesting of the marigold crop (**T1**), and Chinese cabbage seedlings were transplanted with an empty period of 15 days after harvesting of the marigold crop (**T2**).

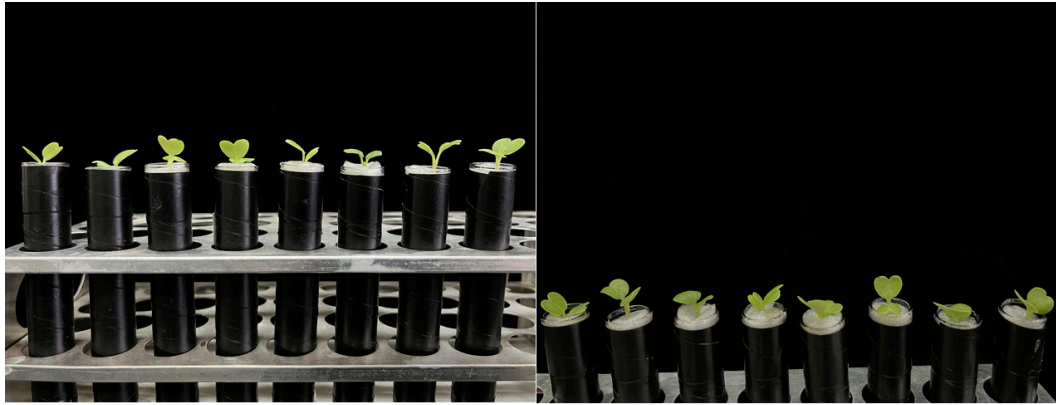

**Figure S2;** Chinese cabbage seedlings were grown hydroponically in the dark to investigate the effect of marigold root exudates, crude extract, and powder on the germination and death of *P. brassicae* resting spores.

**Table S1;** Effects of inoculation of marigold on the disease incidence, disease index, and control effect of cabbage clubroot in the greenhouse.

| Treatment | Disease incidence (%) | Disease index | Control effect (%) |
|-----------|-----------------------|---------------|--------------------|
| CK        | 88.89±3.85a           | 68.25±3.96a   | -----              |
| T1        | 77.78±10.18b          | 56.19±5.30b   | 17.51±8.82b        |
| T2        | 48.89±3.85c           | 31.11±3.35c   | 54.13±7.56a        |

**Note:** Monocropping of Chinese cabbage (**CK**), Chinese cabbage seedlings were transplanted immediately after harvesting of marigold crop (**T1**), and Chinese cabbage seedlings were transplanted with an empty period of 15 days after harvesting of marigold crop (**T2**). Significance differences among treatments are shown by different small letters within a column according to Duncan's multiple range test at  $p < 0.05$ .

**Table S2;** Effects of inoculation of marigold on the disease incidence, disease index, and control effect of cabbage clubroot in the field.

| Treatment | Disease incidence (%) | Disease index | Control effect (%) |
|-----------|-----------------------|---------------|--------------------|
| CK        | 91.67±2.89a           | 68.57±2.85a   | -----              |
| T1        | 81.67±7.64b           | 50.47±1.80b   | 26.33±3.22b        |
| T2        | 58.33±5.77c           | 25.14±3.06c   | 63.35±5.80a        |

**Note:** Monocropping of Chinese cabbage (**CK**), Chinese cabbage seedlings were transplanted immediately after harvesting of marigold crop (**T1**), and Chinese cabbage seedlings were transplanted with an empty period of 15 days after harvesting of marigold crop (**T2**). According to Duncan's multiple range test different small letters within a column shows significance differences among treatments at  $p < 0.05$ .

**Table S3;** Relative abundance of the top 10 dominant bacterial phyla in rhizosphere soil under different experimental conditions ( $\pm$ SEM, n=3).

| Phylum           | CK                 | T1                | T2                |
|------------------|--------------------|-------------------|-------------------|
| Proteobacteria   | 38.80 $\pm$ 2.07bc | 46.04 $\pm$ 4.74a | 41.11 $\pm$ 2.20b |
| Acidobacteria    | 17.60 $\pm$ 3.31ab | 14.06 $\pm$ 3.18b | 20.09 $\pm$ 1.49a |
| Bacteroidetes    | 15.54 $\pm$ 3.03a  | 14.73 $\pm$ 2.71a | 13.97 $\pm$ 1.06a |
| Actinobacteria   | 8.45 $\pm$ 1.36a   | 8.96 $\pm$ 1.94a  | 6.20 $\pm$ 0.57b  |
| Verrucomicrobia  | 6.04 $\pm$ 0.44a   | 5.27 $\pm$ 0.90a  | 6.41 $\pm$ 0.60a  |
| Gemmatimonadetes | 3.75 $\pm$ 0.72a   | 2.83 $\pm$ 0.69a  | 3.46 $\pm$ 0.12a  |
| Chloroflexi      | 3.31 $\pm$ 0.74a   | 2.41 $\pm$ 0.94a  | 3.07 $\pm$ 0.37a  |
| Firmicutes       | 1.80 $\pm$ 0.68a   | 1.62 $\pm$ 0.36a  | 1.49 $\pm$ 0.17a  |
| Planctomycetes   | 1.60 $\pm$ 0.43a   | 1.30 $\pm$ 0.37ab | 1.59 $\pm$ 0.02a  |
| Nitrospirae      | 1.15 $\pm$ 0.06a   | 1.00 $\pm$ 0.17a  | 0.94 $\pm$ 0.09a  |
| Others           | 1.94 $\pm$ 0.61a   | 1.78 $\pm$ 0.33a  | 1.67 $\pm$ 0.17a  |

**Here;** Monocropping of Chinese cabbage (**CK**), Chinese cabbage seedlings were transplanted immediately after harvesting of marigold crop (**T1**), and Chinese cabbage seedlings were transplanted with an empty period of 15 days after harvesting of marigold crop (**T2**). Different lowercase letters within a row represents the significance differences among treatments according to a least significant difference test (LSD;  $p < 0.05$ ).

**Table S4;** Relative abundance of the top 10 dominant bacterial families in rhizosphere soil under different experimental conditions ( $\pm$ SEM, n=3).

| Family               | CK                 | T1                 | T2                |
|----------------------|--------------------|--------------------|-------------------|
| Pseudomonadaceae     | 4.49 $\pm$ 2.65b   | 12.75 $\pm$ 10.44a | 3.02 $\pm$ 1.92c  |
| Sphingomonadaceae    | 6.80 $\pm$ 1.03a   | 6.42 $\pm$ 0.96a   | 6.77 $\pm$ 0.07a  |
| Burkholderiaceae     | 5.45 $\pm$ 0.07a   | 4.37 $\pm$ 0.82a   | 5.73 $\pm$ 1.81a  |
| Chitinophagaceae     | 3.56 $\pm$ 0.56ab  | 3.11 $\pm$ 0.56b   | 4.12 $\pm$ 0.28a  |
| Flavobacteriaceae    | 3.92 $\pm$ 1.03a   | 3.96 $\pm$ 1.54a   | 2.38 $\pm$ 0.32b  |
| Micrococcaceae       | 2.95 $\pm$ 1.14b   | 4.72 $\pm$ 1.27a   | 1.47 $\pm$ 0.15c  |
| Gemmatimonadaceae    | 3.37 $\pm$ 0.64a   | 2.53 $\pm$ 0.59a   | 3.00 $\pm$ 0.12a  |
| Rhizobiaceae         | 3.28 $\pm$ 0.46a   | 2.69 $\pm$ 0.75ab  | 1.99 $\pm$ 0.07b  |
| Xanthomonadaceae     | 2.20 $\pm$ 0.13a   | 3.00 $\pm$ 0.75a   | 2.61 $\pm$ 0.51a  |
| Uncultured bacterium | 10.66 $\pm$ 2.27ab | 8.97 $\pm$ 2.06b   | 13.34 $\pm$ 0.96a |
| Others               | 53.34 $\pm$ 0.91a  | 47.47 $\pm$ 7.11a  | 55.57 $\pm$ 1.29a |

**Here;** Monocropping of Chinese cabbage (**CK**), Chinese cabbage seedlings were transplanted immediately after harvesting of marigold crop (**T1**), and Chinese cabbage seedlings were transplanted with an empty period of 15 days after harvesting of marigold crop (**T2**). Significance differences among treatments are shown by different small letters within a row according to a least significant difference test (LSD;  $p < 0.05$ ).

**Table S5;** Relative abundance of the top 15 dominant bacterial genera in rhizosphere soil under different experimental conditions ( $\pm$ SEM, n=3).

| Genus                             | CK                  | T1                   | T2                  |
|-----------------------------------|---------------------|----------------------|---------------------|
| <i>Pseudomonas</i>                | 0.045 $\pm$ 0.027b  | 0.127 $\pm$ 0.104a   | 0.030 $\pm$ 0.019c  |
| <i>Sphingomonas</i>               | 0.047 $\pm$ 0.006a  | 0.040 $\pm$ 0.007a   | 0.043 $\pm$ 0.002ab |
| <i>Flavobacterium</i>             | 0.039 $\pm$ 0.010a  | 0.039 $\pm$ 0.015a   | 0.024 $\pm$ 0.003b  |
| <i>Pedobacter</i>                 | 0.035 $\pm$ 0.006a  | 0.016 $\pm$ 0.006b   | 0.014 $\pm$ 0.003b  |
| <i>Allorhizobium-Neorhizobium</i> | 0.025 $\pm$ 0.004a  | 0.017 $\pm$ 0.005b   | 0.012 $\pm$ 0.001c  |
| <i>Bryobacter</i>                 | 0.013 $\pm$ 0.001ab | 0.010 $\pm$ 0.002b   | 0.015 $\pm$ 0.002a  |
| <i>Luteolibacter</i>              | 0.016 $\pm$ 0.002a  | 0.012 $\pm$ 0.003b   | 0.011 $\pm$ 0.001b  |
| <i>RB41</i>                       | 0.014 $\pm$ 0.003a  | 0.011 $\pm$ 0.003a   | 0.011 $\pm$ 0.002b  |
| <i>Nitrospira</i>                 | 0.012 $\pm$ 0.001a  | 0.010 $\pm$ 0.001b   | 0.010 $\pm$ 0.001b  |
| <i>Chthoniobacter</i>             | 0.009 $\pm$ 0.001a  | 0.009 $\pm$ 0.001a   | 0.010 $\pm$ 0.001a  |
| <i>MND1</i>                       | 0.008 $\pm$ 0.001b  | 0.007 $\pm$ 0.004b   | 0.010 $\pm$ 0.000a  |
| <i>Ramlibacter</i>                | 0.009 $\pm$ 0.001a  | 0.006 $\pm$ 0.002b   | 0.009 $\pm$ 0.001a  |
| <i>Novosphingobium</i>            | 0.004 $\pm$ 0.001b  | 0.009 $\pm$ 0.002a   | 0.008 $\pm$ 0.000a  |
| <i>JGI_0001001-H03</i>            | 0.008 $\pm$ 0.001a  | 0.005 $\pm$ 0.001a   | 0.009 $\pm$ 0.001a  |
| <i>Delftia</i>                    | 0.000 $\pm$ 0.000b  | 0.0008 $\pm$ 0.0005b | 0.009 $\pm$ 0.015a  |

**Here;** Monocropping of Chinese cabbage (**CK**), Chinese cabbage seedlings were transplanted immediately after harvesting of marigold crop (**T1**), and Chinese cabbage seedlings were transplanted with an empty period of 15 days after harvesting of marigold crop (**T2**). Different lowercase letters within a row represents the significance differences among treatments according to a least significant difference test (LSD;  $p < 0.05$ ).



**Table S6;** Characteristics of the co-occurrence network.

| Network properties             | Value |
|--------------------------------|-------|
| Number of nodes                | 79    |
| Number of edges                | 451   |
| Modularity                     | 0.442 |
| Number of communities          | 6     |
| Network diameter               | 5     |
| Network Density                | 0.146 |
| Average shortest path length   | 2.418 |
| Average clustering coefficient | 0.503 |
